# Supplementary material for: A Three-Year Biocrime Sanitary Surveillance on Illegally Imported Companion Animals
Source: MDPI journal article supplement (doi:10.3390/pathogens10081047), 2021-08-18

**Table S1.** Origin of seized companion animals per year (2018-2020).

| Year  | EU membership | Country        | Puppies | Kittens | Total |
|-------|---------------|----------------|---------|---------|-------|
| 2018  | MS            | Austria        | 21      |         | 21    |
|       |               | Czech Republic | 6       |         | 6     |
|       |               | Hungary        | 56      |         | 56    |
|       |               | Romania        | 10      | 4       | 14    |
|       |               | Slovakia       | 9       |         | 9     |
|       | Non MS        | Serbia         | 4       |         | 4     |
|       |               | Ukraine        |         | 35      | 35    |
|       | No data       | No data        | 6       |         | 6     |
| 2019  | MS            | Austria        | 27      |         | 27    |
|       |               | Hungary        | 32      |         | 32    |
|       |               | Slovakia       | 29      | 4       | 33    |
|       | Non MS        | Serbia         | 9       |         | 9     |
|       |               | Ukraine        |         | 5       | 5     |
|       | No data       | No data        | 4       |         | 4     |
| 2020  | MS            | Croatia        | 8       |         | 8     |
|       |               | Hungary        | 153     | 1       | 154   |
|       |               | Poland         | 5       |         | 5     |
|       |               | Romania        | 19      |         | 19    |
|       |               | Slovakia       | 141     |         | 141   |
|       | Non MS        | Belarus        | 14      |         | 14    |
|       |               | Moldova        | 7       | 6       | 13    |
|       |               | Serbia         | 12      |         | 12    |
|       |               | Ukraine        |         | 7       | 7     |
|       | No data       | No data        | 41      |         | 41    |
| Total |               |                | 613     | 62      | 675   |

**Table S2.** Laboratory results from seized kittens (2018-2020).

| Target                      | Positive/analyzed | Prevalence % (CI%) |
|-----------------------------|-------------------|--------------------|
| <i>Giardia</i> spp.         | 0/42              | 0.00 – 8.38 (*)    |
| <i>Cryptosporidium</i> spp. | 0/42              | 0.00 – 8.38 (*)    |
| <i>Salmonella</i>           | 6/24              | 11.99 – 44.89      |
| Feline Panleukopenia virus  | 1/12              | 1.48 – 35.39       |
| Feline Coronavirus          | 3/12              | 8.89 – 53.23       |
| <i>S. pseudointermedius</i> | 4/66              | 2.38 – 14.57       |
| <i>Microsporum canis</i>    | 2/32              | 1.73 – 20.14       |

(\*) One-sided 97.5% confidence interval

**Table S3.** Distribution of results (CPV Vs CaCoV) on pooled stools from puppies (2018-2020).

| Target            |          | Canine Coronavirus |             |               |
|-------------------|----------|--------------------|-------------|---------------|
|                   |          | NEGATIVE           | POSITIVE    | TOTAL         |
| Canine Parvovirus | NEGATIVE | 15<br>55.6%        | 12<br>44.4% | 27<br>100.0%  |
|                   | POSITIVE | 88<br>58.3%        | 63<br>41.7% | 151<br>100.0% |
|                   | TOTAL    | 103<br>57.9%       | 75<br>42.1% | 178<br>100.0% |

**Table S4.** Distribution of results (CPV Vs Giardia spp.) on pooled stools from puppies (2018-2020).

| Target            |          | Giardia spp. |             |               |
|-------------------|----------|--------------|-------------|---------------|
|                   |          | NEGATIVE     | POSITIVE    | TOTAL         |
| Canine Parvovirus | NEGATIVE | 9<br>31.0%   | 20<br>69.0% | 29<br>100.0%  |
|                   | POSITIVE | 39<br>40.2%  | 58<br>59.8% | 97<br>100.0%  |
|                   | TOTAL    | 48<br>38.1%  | 78<br>61.9% | 126<br>100.0% |

**Figure S1.** Puppies' small intestines of dead individuals. A: enteritis, acute with serosal fibrinous exudation and hemorrhages. B: enteritis, acute with serosal haemorrhages. C: enteritis, acute, necrotico-haemorrhagic, diffuse, severe.

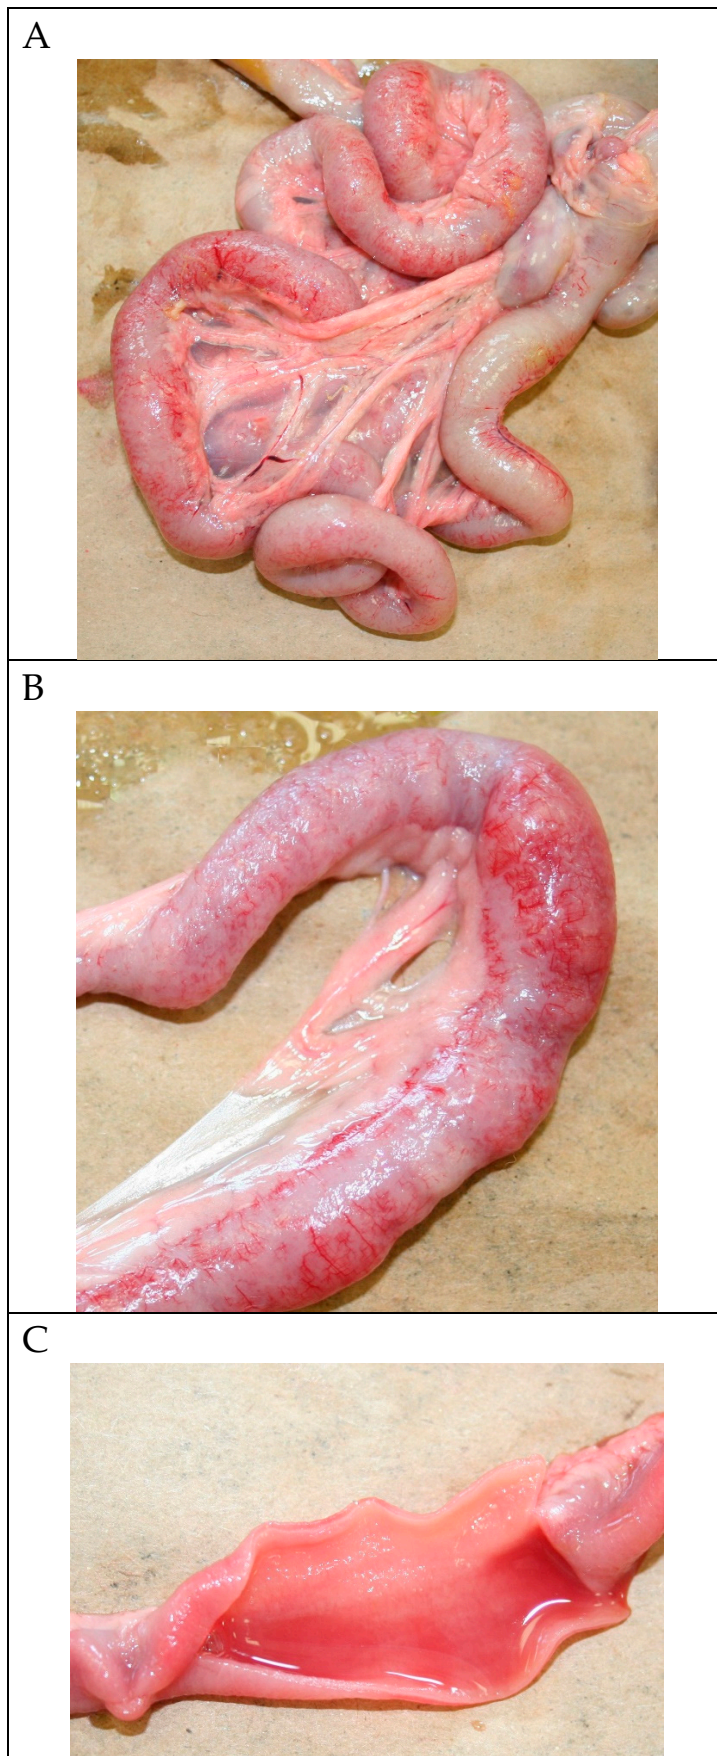

Supplement: s1 [file s1]
